# Supplementary material for: Fabrication of silver nanoparticles through reduction by ε-caprolactam without using protecting agent
Source: Royal Society of Chemistry journal article supplement (doi:10.1039/c4ra01675k), 2014-01-01
Supplement: c4ra01675k1.pdf [file c4ra01675k1.pdf]

## Support figure

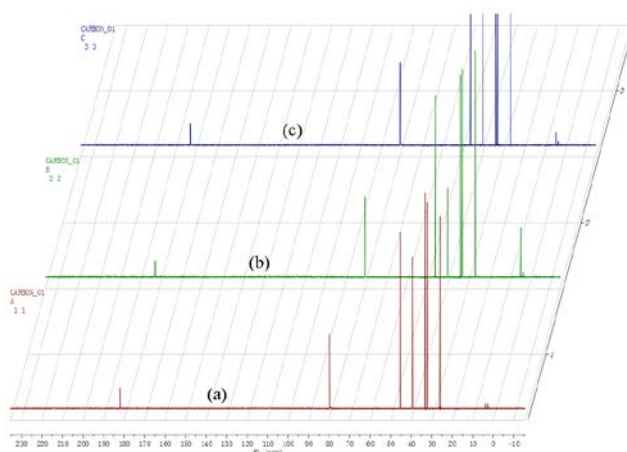

**Figure. 1S** NMR spectra of pure CL (a) and CL after oxidation by silver nitrate (b) and oxygen (c). (NMR samples were prepared by dissolving the purified CL and oxidizing CL by silver nitrate and oxygen to give a sample with concentration of 10mg/ml in CDCl<sub>3</sub>. Solution <sup>13</sup>C NMR spectra were collected on a VNMRs 600 MHz NMR. A 5-mm NMR probe was used with an average of 2,000 scans to give sufficient signal-to-noise signals. The chemical shift was recorded in relative to TMS.)
